# Supplementary material for: Prolonging the integrated stress response enhances CNS remyelination in an inflammatory environment
Source: eLife. 2021 Mar 23;10:e65469. doi: 10.7554/eLife.65469 (PMC7987340; doi:10.7554/eLife.65469)
Supplement: Figure 1—source data 1. [file elife-65469-fig1-data1.xlsx]

## Sheet: 1A
Figure 1A - Cumulative clinical scores
	PID	EAE + Vehicle	EAE + Sephin 1
	5	0	0
	6	0	0
	7	0.5	0.5
	8	1.5	1.5
	9	5.5	6
	10	15	14
	11	28.5	26
	12	46.5	42
	13	66.5	60.5
	14	87	79
	15	107	97.5
	16	127.5	115
	17	148	131
	18	168	145.5
	19	186	159
	20	203	173
	21	220	186.5
	22	237	200
	23	254.5	213
	24	271.5	226.5
	25	288.5	240
	26	305	252
	27	322	264
	28	339	276
	29	356	288.5
	30	373	301

## Sheet: 1C
Figure 1C - The number of axons at g-gatio>0.8
	Veh	Seph
	4.80091	8.06939
	4.20509	6.28834
	4.91879	6.78986

## Sheet: 1D
Figure 1D - The total number of axons
	Veh	Seph
	16.2459	20.4082
	20.4853	14.1584
	17.6498	16.4346
