# Supplementary material for: Prolonging the integrated stress response enhances CNS remyelination in an inflammatory environment
Source: eLife. 2021 Mar 23;10:e65469. doi: 10.7554/eLife.65469 (PMC7987340; doi:10.7554/eLife.65469)
Supplement: Figure 3—source data 1. [file elife-65469-fig3-data1.xlsx]

## Sheet: 3B
Figure 3B - The number of ASAP+ cells at W0 and W5
	W0		W5/IFN-g -		W5/IFN-g +
	WT	KO	WT	KO	WT	KO
	720.837	570.32	673.622	375.181	262.037	419.291
	878.483	680.228	677.664	520.741	285.788	267.178
	666.12	517.155	564.305	484.539	339.524	324.079

## Sheet: 3C
Figure 3C - The number of ASAP+ cells at W8
	W8/IFN-g -		W8/IFN-g +
	WT	KO	WT	KO
	859.887	891.289	505.267	766.692
	681.947	780.506	562.94	659.866
	983.57	783.721	540.457	710.659
