# Supplementary material for: Prolonging the integrated stress response enhances CNS remyelination in an inflammatory environment
Source: eLife. 2021 Mar 23;10:e65469. doi: 10.7554/eLife.65469 (PMC7987340; doi:10.7554/eLife.65469)
Supplement: Figure 4—source data 1. [file elife-65469-fig4-data1.xlsx]

## Sheet: 4C
Figure 4C - The percentage of myelinated axons at W0 and W5
	W0		W5/IFN-g -		W5/IFN-g +
	WT	KO	WT	KO	WT	KO
	58.35	40.42	17.66	28.53	29.3	26.94
	57.19	47.66	26.39	25.29	22.28	25.81
	42.2	45.3	21.38	19.79	22.23	19.94
	52.33	55.81	28.16	27.04	26.91	24.83

## Sheet: 4D
Figure 4D - The percentage of myelinated axons at W8
	W8/IFN-g -		W8/IFN-g +
	WT	KO	WT	KO
	38.1	49.3	29.35	50.84
	38.94	41.18	24.85	34.51
	40.38	36.11	32.84	57.87
	53.28	43.69	30.57	53.43
