# Supplementary material for: Prolonging the integrated stress response enhances CNS remyelination in an inflammatory environment
Source: eLife. 2021 Mar 23;10:e65469. doi: 10.7554/eLife.65469 (PMC7987340; doi:10.7554/eLife.65469)
Supplement: Figure 5—source data 1. [file elife-65469-fig5-data1.xlsx]

## Sheet: 5B
Figure 5B - The number of ASPA+ cells at W0, W3 and W5
	W0	W3/IFN-g -	W5/IFN-g -		W3/IFN-g +	W5/IFN-g +
			Veh	Seph		Veh	Seph
	720.837	523.224	673.622	743.384	370.964	262.037	323.565
	878.483	418.427	677.664	545.695	418.223	285.788	349.142
	661.495	430.561	564.305	445.001	453.709	339.524	405.981
	666.12					376.333	500.027

## Sheet: 5C
Figure 5C - The number of ASPA+ cells at W8
	W8/IFN-g -		W8/IFN-g +
	Veh	Seph	Veh	Seph
	956.683	857.345	513.362	642.291
	828.783	742.625	503.64	744.84
	553.584	769.854	575.656	631.657
