# Supplementary material for: Prolonging the integrated stress response enhances CNS remyelination in an inflammatory environment
Source: eLife. 2021 Mar 23;10:e65469. doi: 10.7554/eLife.65469 (PMC7987340; doi:10.7554/eLife.65469)
Supplement: Figure 7—source data 1. [file elife-65469-fig7-data1.xlsx]

## Sheet: 7B
Figure 7B - The number of OPCs at W5 (WT and KO)
# of PDGFR+ cells	W5/IFN-g -		W5/IFN-g +
	WT	KO	WT	KO
	161.814	113.317	90.479	156.762
	218.626	141.04	151.777	166.834
	157.351	172.112	161.468	172.959
# of PDGFR+/ki67+ cells	W5/IFN-g -		W5/IFN-g +
	WT	KO	WT	KO
	15.4796	13.7881	9.3662	6.27046
	14.4931	4.03234	13.8477	9.26136
	19.6537	9.02622	12.2392	9.93116

## Sheet: 7C
Figure 7C - The number of OPCs at W8 (WT and KO)
# of PDGFR+ cells	W8/IFN-g -		W8/IFN-g +
	WT	KO	WT	KO
	197.839	176.955	184.975	126.697
	213.814	131.387	191.79	232.161
	166.706	167.83	139.431	138.687
# of PDGFR+/ki67+ cells	W8/IFN-g -		W8/IFN-g +
	WT	KO	WT	KO
	7.73397	7.45701	13.3994	8.33802
	13.6722	4.89447	22.3282	25.5815
	9.61763	13.6243	8.64301	10.8067

## Sheet: 7E
Figure 7E - The number of OPCs at W5 (Veh and Seph)
# of PDGFR+ cells	W5/IFN-g -		W5/IFN-g +
	Veh	Seph	Veh	Seph
	161.814	156.794	180.269	133.944
	218.626	209.153	143.353	136.163
	157.351	129.629	114.387	119.403
# of PDGFR+/ki67+ cells	W5/IFN-g -		W5/IFN-g +
	Veh	Seph	Veh	Seph
	15.4796	11.1273	12.5917	3.66972
	14.4931	12.5504	7.56869	6.14355
	19.6537	11.3515	6.75458	9.73638

## Sheet: 7F
Figure 7F - The number of OPCs at W8 (Veh and Seph)
# of PDGFR+ cells	W8/IFN-g -		W8/IFN-g +
	Veh	Seph	Veh	Seph
	141.615	150.681	139.431	154.559
	147.324	151.532	115.628	186.213
	137.861	131.342	115.016	138.817
# of PDGFR+/ki67+ cells	W8/IFN-g -		W8/IFN-g +
	Veh	Seph	Veh	Seph
	9.5205	8.15308	8.64301	7.28621
	5.78704	14.6473	5.66654	8.2691
	15.565	10.6981	10.3825	2.95217
