# Supplementary material for: Prolonging the integrated stress response enhances CNS remyelination in an inflammatory environment
Source: eLife. 2021 Mar 23;10:e65469. doi: 10.7554/eLife.65469 (PMC7987340; doi:10.7554/eLife.65469)
Supplement: Figure 8—source data 1. [file elife-65469-fig8-data1.xlsx]

## Sheet: 8C
Figure 8C - The number of ASPA+ cells at W8/IFN-g +
	Veh	Seph	BZA	BZA+Seph
	463.543	648.775	851.523	879.707
	583.794	754.449	573.627	723.468
	539.924	672.16	833.07	773
	453.893	778.987	892.769	664.148

## Sheet: 8D
Figure 8D - The percentage of melinated axons at W8/IFN-g +
	Veh	Seph	BZA	BZA+Seph	W0
	38.4695	45.7476	47.0126	49.9706	58.35
	32.6072	43.5035	43.522	45.7893	57.19
	32.6813	43.9915	43.4531	44.8415	42.2
	28.9848	42.318	40.948	42.033	52.33

## Sheet: 8E
Figure 8E - g-ratio at W8/IFN-g +
	Veh	Seph	BZA	BZA+Seph	W0
	0.834622	0.803676	0.795447	0.777094	0.784
	0.811493	0.794338	0.798209	0.788432	0.775
	0.807256	0.815068	0.821229	0.77526	0.773
	0.805588	0.794775	0.8051	0.772815	0.76
